# Supplementary material for: Synthesis and lithium storage performance of Co2SiO4 nanoparticles
Source: Royal Society of Chemistry journal article supplement (doi:10.1039/c5ra11327j), 2015-01-01
Supplement: c5ra11327j1.pdf [file c5ra11327j1.pdf]

## Supporting Information for Synthesis and lithium storage performances of $\text{Co}_2\text{SiO}_4$ Nanoparticles

Peisheng Guo and Chengxin Wang\*

*State Key Laboratory of Optoelectronic Materials and Technologies, School of  
Physics Science and Engineering, Sun Yat-sen (Zhongshan) University, Guangzhou  
510275, People's Republic of China*

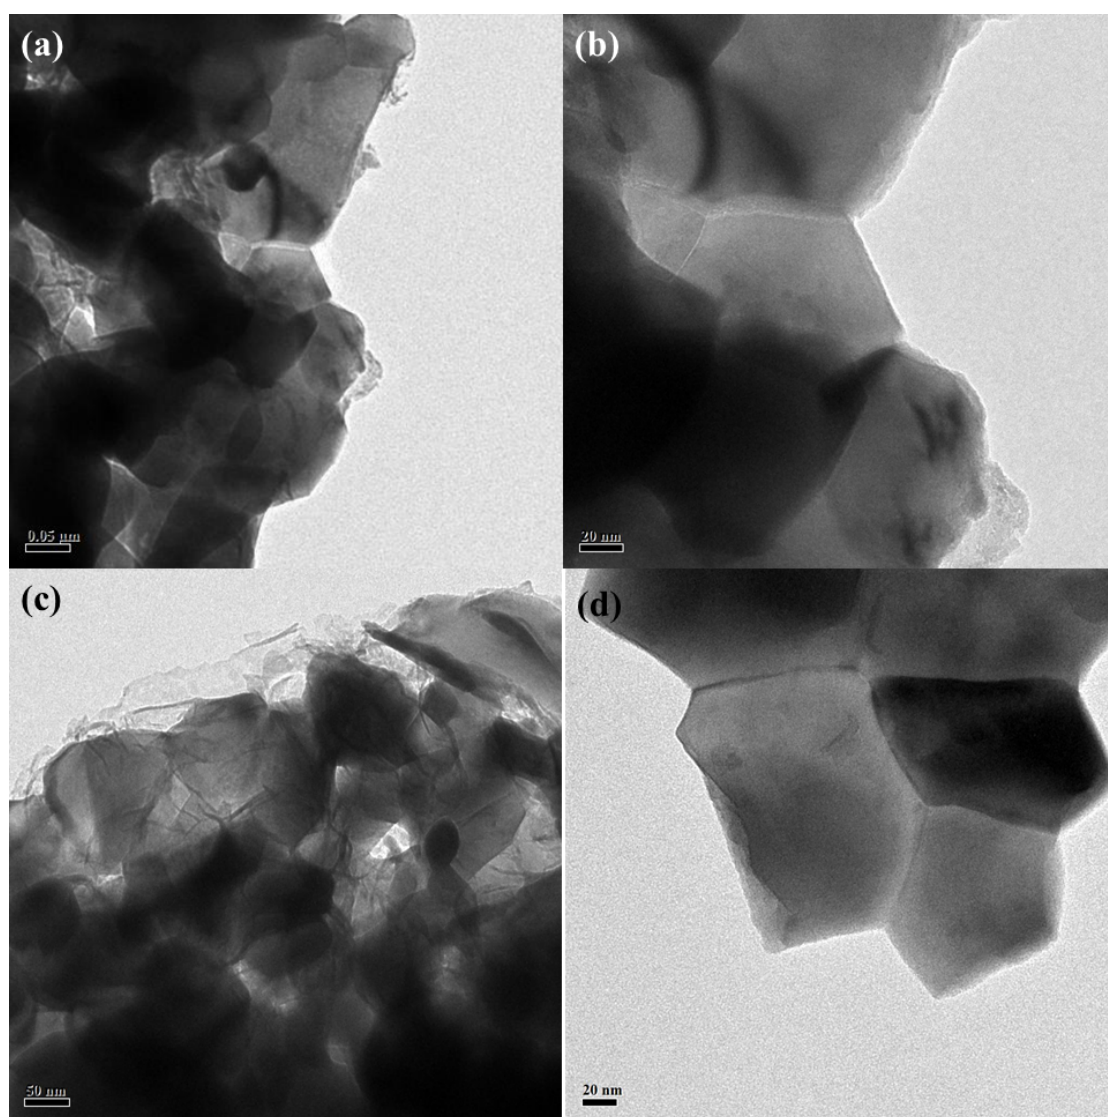

Figure S1: the typical TEM images of the plate-like particles

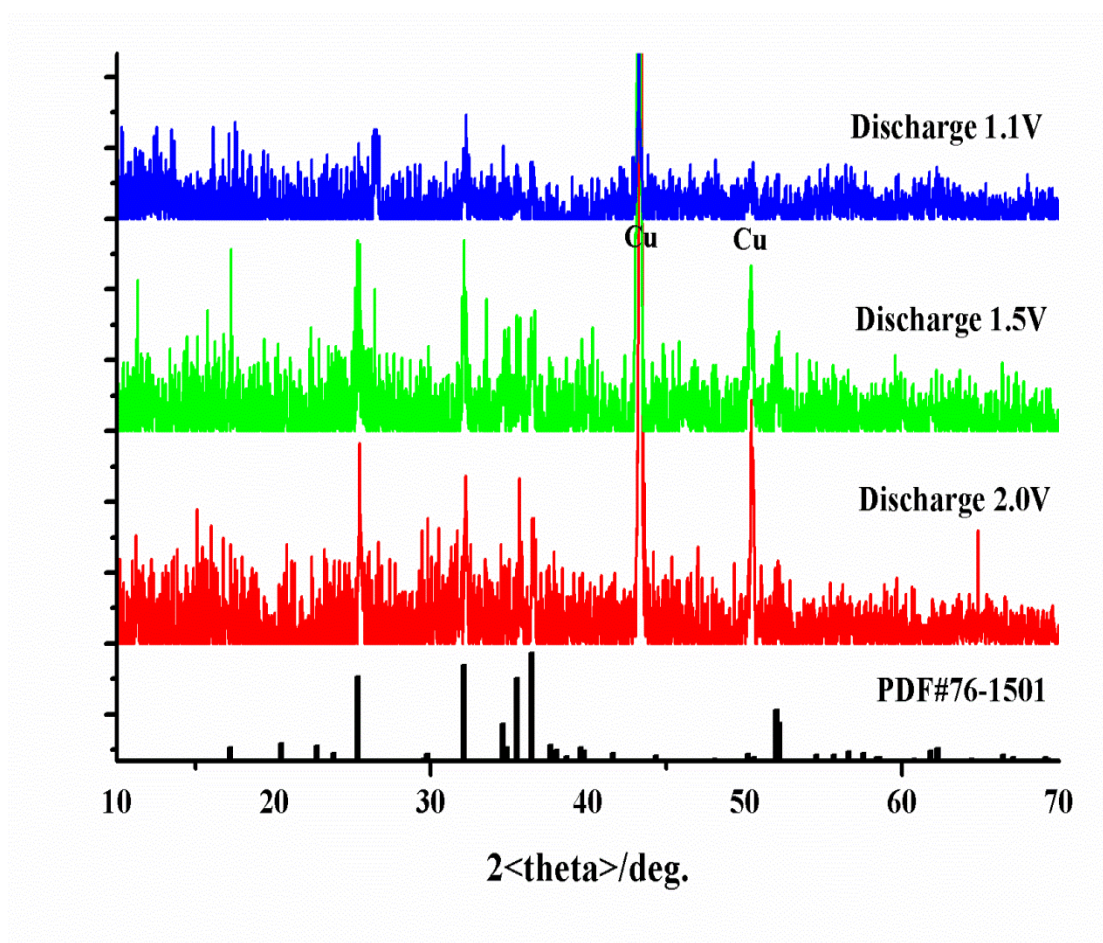

Figure S2 X-ray diffraction (XRD) pattern of the  $\text{Co}_2\text{SiO}_4$  electrodes at different voltages of the first discharge.

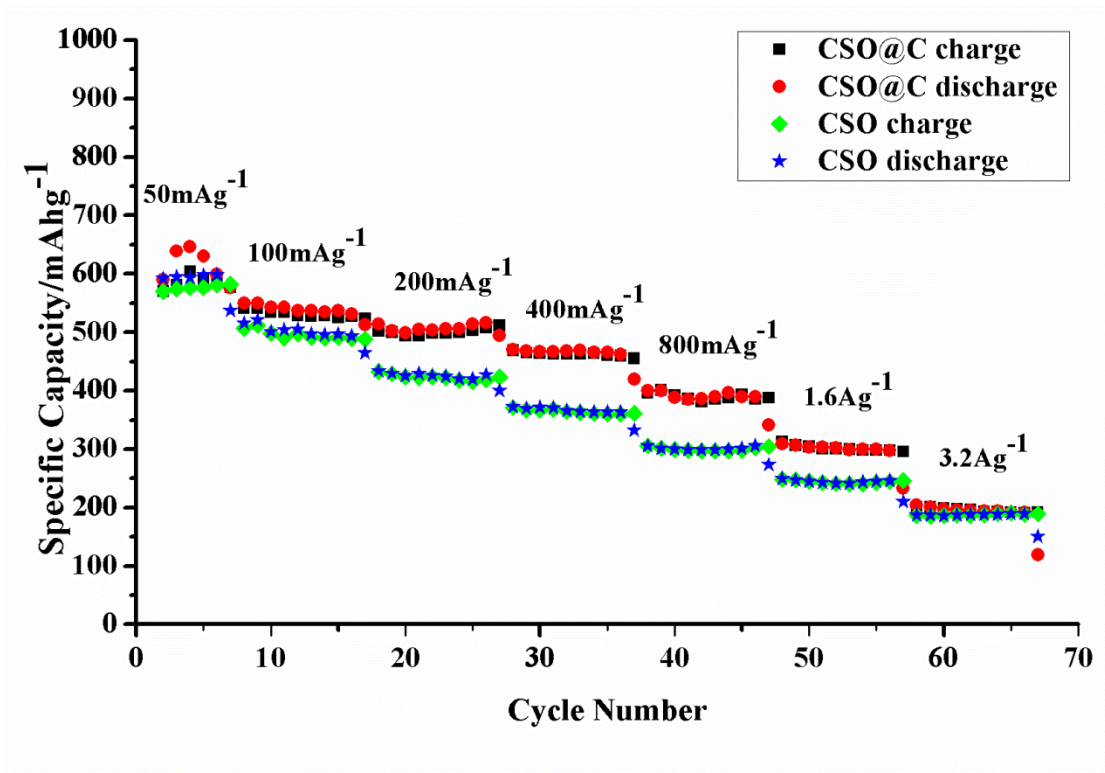

Figure S3 rate capacity of the  $\text{Co}_2\text{SiO}_4$  and carbon-coated  $\text{Co}_2\text{SiO}_4$  at various current densities between  $50 \text{ mAg}^{-1}$  and  $3.2 \text{ Ag}^{-1}$ .

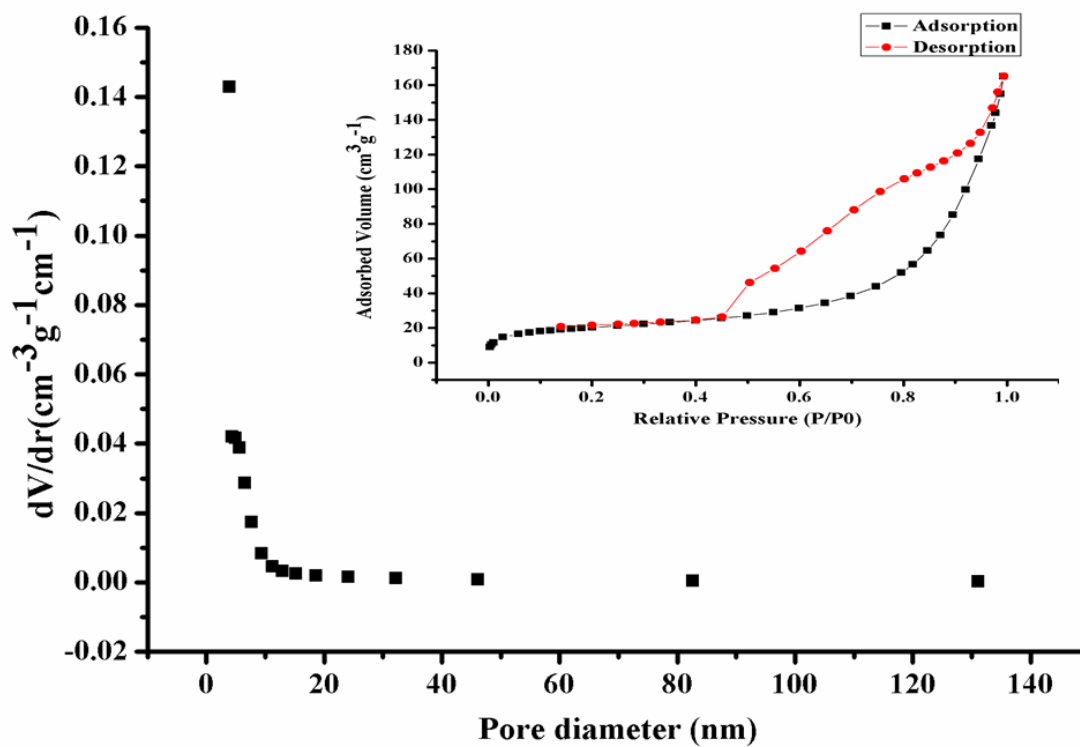

Figure S4 Nitrogen adsorption/desorption isotherms and BJH pore size distributions of  $\text{Co}_2\text{SiO}_4$ .
